# Supplementary figures and images for: Low Tristetraprolin Expression Is Associated with Lethal Prostate Cancer
Source: Oxford University Press journal article supplement (doi:10.1158/1055-9965.epi-18-0667), 2018-11-12

Supplementary Table 1: Gene changes (fold change > 1.5; p-value < 0.05)


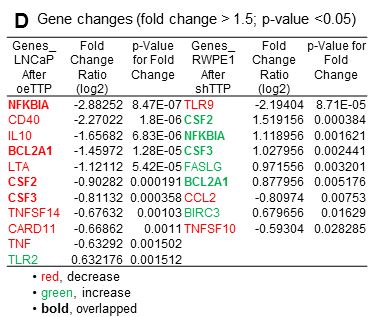

Supplement: 10559965epi180667-sup-203428_2_supp_5121163_ph5rk1.docx [file 10559965epi180667-sup-203428_2_supp_5121163_ph5rk1.docx]
